# Supplementary material
Source: PubMed Central journal article supplement (PMC6026246)
Supplement: mmc1.pdf [file mmc1.pdf]

## Three-dimensional Printing and 3D Slicer

### Powerful Tools in Understanding and Treating Structural Lung Disease

*George Z. Cheng, MD, PhD; Raul San Jose Estepar, PhD; Erik Folch, MD; Jorge Onieva, MSc; Sidhu Gangadharan, MD; and Adnan Majid, MD*

CHEST 2016; 149(5):1136-1142

*Online supplements are not copyedited prior to posting and the author(s) take full responsibility for the accuracy of all data.*

© 2016 AMERICAN COLLEGE OF CHEST PHYSICIANS. Reproduction of this article is prohibited without written permission from the American College of Chest Physicians. See online for more details. DOI: 10.1016/j.chest.2016.03.001

**e-Appendix 1.****Glossary of Terms**

Voxel: Analogous to a pixel in 2D space (ie. a pixel on a computer screen), a voxel defines the value of a point in 3D space.

.STL: A file format originally developed by 3D systems to use for stereolithography CAD software. It is now one of the most popular software formats for 3D printing.

GrowCut volume segmentation: It is a region-growing algorithm where user input foreground and background color for a selected area of interest on the image. The algorithm will then seek out adjacent pixel that best match the user input example.

Airway segmentation: Using chest CT images the algorithm segment all the pixels with an intensity below a threshold, output volume is also automatically created.

Region-growing: an umbrella terms incorporate different segmentation technique.

Fiducial/seed: this is a user selected pixel where it serves as a reference value for the segmentation algorithms to work.
